# Supplementary material for: Clinical and prognostic features of Langerhans cell histiocytosis in adults
Source: PubMed Central journal article supplement — Cancer Sci. 2023 Jun 26;114(9):3687–97. doi: 10.1111/cas.15879 (PMC10475785; doi:10.1111/cas.15879), 2023-06-26
Supplement: CAS-114-3687-s001.pdf [file CAS-114-3687-s001.pdf]

## Supporting Information

### Supplementary Methods

#### Methods for Sequencing

Genomic DNA was extracted from tumor tissue FFPE samples using the truXTRAC FFPE tNA Ultra kit (Covaris; Woburn, Massachusetts, USA) and from a control buccal swab (SW) using QIAamp DNA Mini kit (QIAGEN; Venlo, Limburg, The Netherlands) according to the manufacturers' instructions. The quality of genomic DNA was analyzed using a Qubit Fluorometer (Thermo Fisher) and TapeStation (Agilent). Whole-exome sequencing was performed on a Nextseq 550 platform (Illumina) after enrichment using Magnis Sureselect XT HS Human All Exon V7 probes (Agilent). The average reading level depth for tumor tissue FFPE and SW samples was 86.2× and 117.8×, respectively.

Primary processing of sequencing data was performed using the Genomon 2.6.2 pipeline. Specifically, single nucleotide variants, insertions, and deletions were identified. All data were aligned to the human genome build 19 (hg19). The Integrative Genomics Viewer version 2.11.4

(<https://software.broadinstitute.org/software/igv/>) was used to visualize and inspect the read alignments and variant calls. Annotations and high-stringency filtering of all variants were completed using an in-house pipeline (Nakamura S, et al. Blood. 2019; 133(25):2682-95). The databases used to annotate variants included RefSeq (<http://www.ncbi.nlm.nih.gov/RefSeq/>), the 1000 Genomes Project as of August 2015 (<http://www.internationalgenome.org/data>), dbSNP131 (<http://www.ncbi.nlm.nih.gov/projects/SNP/>), ToMMo as of August 2020 (<https://ijgvd.megabank.tohoku.ac.jp/>), the Human Genetic Variation Database as of July 2016 (<http://www.hgvd.genome.med.kyoto-u.ac.jp/>), ClinVar as of May 2021 (<https://www.ncbi.nlm.nih.gov/clinvar/>), the Human Gene Mutation Database Professional as of March 2017 (<http://www.hgmd.cf.ac.uk/ac/index.php>), the cBioPortal for Cancer Genomics as of September 2015 (<http://cbioportal.org>), the Catalogue Of Somatic Mutations In Cancer version 94 (<http://cancer.sanger.ac.uk/cosmic>), and the ICGC Data Portal (<https://dcc.icgc.org/>). The computational algorithms Sorting Intolerant From Tolerant (SIFT,<http://sift-dna.org>), PolyPhen2 (<http://genetics.bwh.harvard.edu/pph2/>), and MutationTaster (<http://www.mutationtaster.org/>) were used to predict whether mutations were damaging. After adding annotations, single nucleotide mutation and indel data were used to identify LCH-related genes: *BRAF*, *MAP2K*, *KRAS*, *NRAS*, *CSF1R*, *ARAF*, *PIK3CA*, *KIT*, *MAP2K2*, *JAK3*, *PIK3CD*, *RAF1*, *ALK*, *MAPK7*, *MET*, *CSF3R*, and *TEK* (Nat Med. 2019 Dec;25(12):1839-1842.), and we curated pathologically significant mutations based on database registration and functional prediction.

**Supplementary Table S1. Additional malignancies**

| Age at diagnosis years, Cancer    |                               |                               |
|-----------------------------------|-------------------------------|-------------------------------|
| Preceding LCH diagnosis           | Concurrent with LCH diagnosis | After LCH diagnosis           |
| 18, Germ cell tumor               | 40, Thyroid papilla carcinoma | 29, Thyroid papilla carcinoma |
| 24, T-LBL                         | 46, Chordoma                  | 45, MDS                       |
| 30, Gastric cancer                | 49, Hodgkin lymphoma          | 61, Oropharyngeal cancer      |
| 39, Phyllodes tumor of the breast | 60, Adult T cell leukemia     | 64, LCS                       |
| 43, Seminoma                      |                               | 67, MDS                       |
| 47, Cervical cancer               |                               | 82, AML                       |
| 54, Spinal cord tumor             |                               |                               |
| 60, Rectal cancer                 |                               |                               |
| 75, Cecal cancer                  |                               |                               |

Abbreviations: T-ALL/LBL, T-lymphoblastic leukemia / lymphoma; MDS, myelodysplastic syndromes; LCS, Langerhans cell sarcoma; AML, acute myeloid leukemia

**Supplementary Table S2. Initial treatment in 86 patients with Langerhans cell histiocytosis (LCH) according to disease manifestation pattern**

| Diagnosis at treatment | Chemotherapy | Immunotherapy <sup>a</sup> | Radiotherapy | Operation | Observation    | Other |
|------------------------|--------------|----------------------------|--------------|-----------|----------------|-------|
| SSs, n                 | 0            | 0                          | 3            | 6         | 1              | 0     |
| SSm, n                 | 8            | 4                          | 1            | 4         | 3              | 2     |
| PLCH, n                | 0            | 1                          | 0            | 1         | 6 <sup>b</sup> | 0     |
| MS, n                  | 33           | 3                          | 1            | 3         | 3              | 3     |

Abbreviations: SSs-LCH, single system with single-site LCH; SSm-LCH, single system with multiple-site LCH; PLCH, primary pulmonary LCH; MS-LCH, multisystem LCH

<sup>a</sup>Immunotherapy: With prednisolone

<sup>b</sup>Smoking cessation was prescribed

**Supplementary Table S3. The lesion site, symptoms at diagnosis, and course of treatment in 13 patients with MS-LCH who did not receive chemotherapy as initial treatment**

| Case | Organ involvement           | Symptoms at diagnosis        | First line therapy        | Second line therapy |
|------|-----------------------------|------------------------------|---------------------------|---------------------|
| 1    | Bone marrow, Spleen         | <sup>a</sup> Without symptom | Observation               | -                   |
| 2    | Lung, Liver                 | <sup>a</sup> Without symptom | Smoking cessation therapy | -                   |
| 3    | Lung, Liver                 | <sup>a</sup> Without symptom | Smoking cessation therapy | -                   |
| 4    | Skin, PG                    | Rash                         | Topical steroid therapy   | -                   |
| 5    | Skin, LN                    | Rash                         | Topical steroid therapy   | -                   |
| 6    | multiple Bones, Skin ,Liver | Rash                         | Topical steroid therapy   | Ultraviolet therapy |
| 7    | Bone, Skin                  | Palpable mass                | Systemic steroid therapy  | -                   |
| 8    | Bone, Lung, Skin            | Cough                        | Systemic steroid therapy  | Chemotherapy        |
| 9    | Bone, LN, ST                | Palpable mass                | Systemic steroid therapy  | Chemotherapy        |
| 10   | multiple Bones, PG, CNS, LN | Palpable lymph nodes         | Radiation therapy         | Chemotherapy        |
| 11   | Bone, Lung                  | Bone pain                    | Operation                 | Chemotherapy        |
| 12   | Bone, LN, ST                | Bone pain                    | Operation                 | Chemotherapy        |
| 13   | multiple Bones, PG, ST      | Bone pain, Palpable mass     | Operation                 | Chemotherapy        |

Abbreviations: PG, pituitary gland; LN, lymph nodes; ST, soft tissue; CNS, central nervous system

<sup>a</sup>Without symptom: without symptom (abnormal findings on images)

**Supplementary Figure S1. Relationship between *BRAF* V600E in plasma cfDNA and PG/CNS involvement in 23 patients.**

Fisher's exact test,  $p = 0.048$

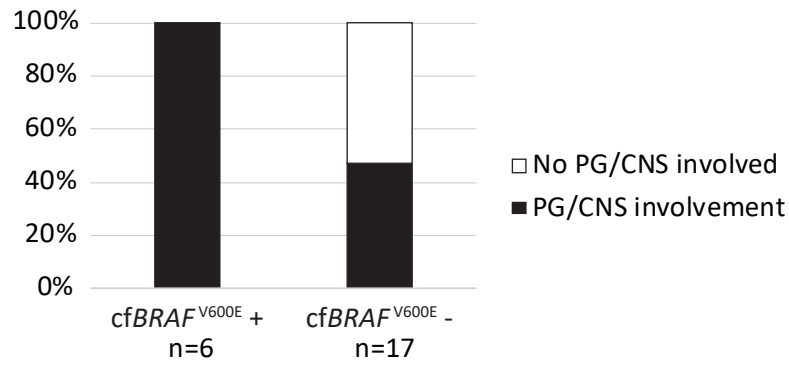

Abbreviations: PG, pituitary gland; CNS, central nervous system, cfBRAF<sup>V600E</sup>, *BRAF* V600E mutation in plasma cell-free DNA

**Supplementary Figure S2. Overall survival (OS) and Event-free survival (EFS) of adult LCH patients with *BRAF* V600E mutation in any of the tests.**

Kaplan–Meier estimation of (A) OS from diagnosis ( $p = 0.08$ ) and (B) EFS from initial treatment ( $p = 0.42$ ) of all 37 patients.

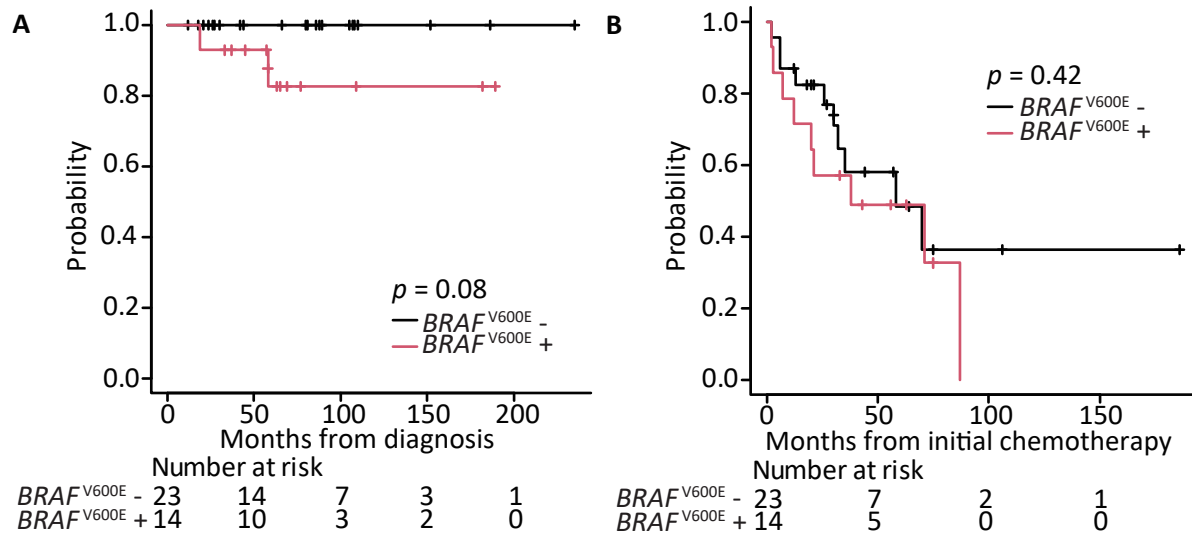

Abbreviations: *BRAF*<sup>V600E</sup> +, for example, positive for *BRAF* V600E in plasma cell free DNA, positive for *BRAF* V600E in lesion tissues detected using immunohistochemistry, polymerase chain reaction, or whole-exome sequencing.

**Figure S3. Overall survival (OS) and Event-free survival (EFS) of adult LCH patients with *BRAF* V600E mutation in plasma cfDNA.**

Kaplan–Meier estimation of (A) OS from diagnosis ( $p = 0.015$ ) and (B) EFS from initial treatment ( $p = 0.057$ ) of all 23 patients.

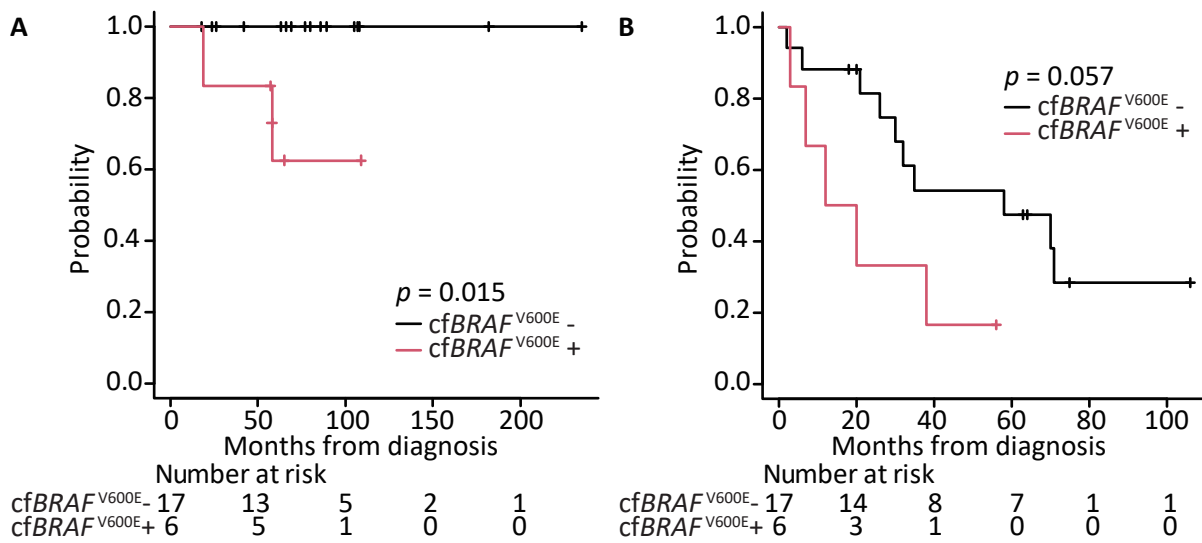

Abbreviations: *cfBRAF*<sup>V600E</sup>, *BRAF* V600E mutation in plasma cell free DNA

**Supplementary Figure S4. Relationship between smoking history and lung disease in 86 adult patients with Langerhans cell histiocytosis (LCH).**

Fisher's exact test,  $p < 0.0001$

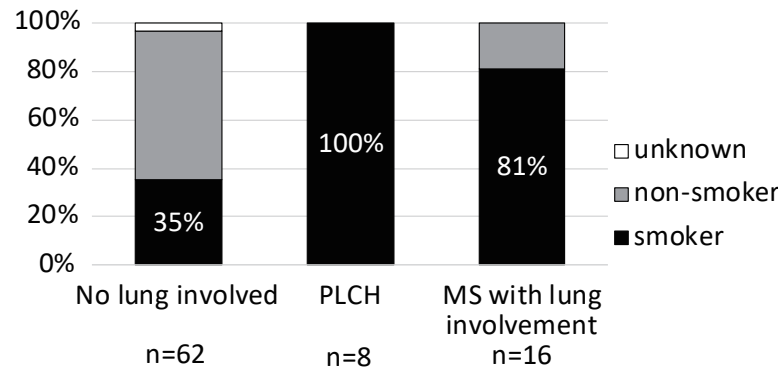

Abbreviations: PLCH, primary pulmonary LCH; MS-LCH, multisystem LCH





|                                                                                    |                                                                                                                                                                                                                                                                                                                                                                                                                                                                                                                                                                                                                                            |
|------------------------------------------------------------------------------------|--------------------------------------------------------------------------------------------------------------------------------------------------------------------------------------------------------------------------------------------------------------------------------------------------------------------------------------------------------------------------------------------------------------------------------------------------------------------------------------------------------------------------------------------------------------------------------------------------------------------------------------------|
| Histopathological Positivity                                                       | <input type="checkbox"/> Only Hematoxylin-Eosin Stain <input type="checkbox"/> CD1a <input type="checkbox"/> S100 <input type="checkbox"/> Langerin <input type="checkbox"/> Birbeck granules                                                                                                                                                                                                                                                                                                                                                                                                                                              |
| Genetic Mutations                                                                  | <input type="checkbox"/> BRAF-V600E Mutation: positive, Negative, Unknown ( <input type="checkbox"/> Immunohistochemistry <input type="checkbox"/> Sequence <input type="checkbox"/> Cell Free DNA) <input type="checkbox"/> Other( MAP2K1mutation )                                                                                                                                                                                                                                                                                                                                                                                       |
| Date of First Visit For Your Department                                            | mm/yyyy                                                                                                                                                                                                                                                                                                                                                                                                                                                                                                                                                                                                                                    |
| Blood Test (Pre-therapy)<br>dd/mm/yy                                               | Blood count: RBC( x10 <sup>4</sup> /mL), Hb( g/dL), Ht( %), WBC( /mL), PLT( x10 <sup>4</sup> /mL), White blood cell differentiation: Neu %、Ly %、Mo %、Eo %、Ba %、Other %<br>Biochemical test: CRP( mg/dL), Ig G/A/M( / / mg /dL), sIL2R( ), AST( IU/L), ALT( IU/L), ALP( IU/L), LDH( IU/L), Alb( g/dL), BAP(Bone Specific Alkaline Phosphatase)( U/L), NTX(Type I collagen cross-linked N-telopeptide( )), TRACP5b(Tartrate-resistant acid phosphatase)( )                                                                                                                                                                                   |
| Image Test (Pre-therapy)                                                           | FDG-PET: <input type="checkbox"/> Not Administered, <input type="checkbox"/> Administered (Finding Report: )<br>CT: <input type="checkbox"/> Not Administered, <input type="checkbox"/> Administered (Finding Report: )<br>Brain MRI: <input type="checkbox"/> Not Administered, <input type="checkbox"/> Administered (Finding Report: )<br>Bone Scintigraphy: <input type="checkbox"/> Not Administered, <input type="checkbox"/> Administered (Finding Report: )<br>Gallium Scintigraphy: <input type="checkbox"/> Not Administered, <input type="checkbox"/> Administered (Finding Report: )                                           |
| Physiological Examination                                                          | Bone Marrow aspiration/biopsy: <input type="checkbox"/> Not Administered, <input type="checkbox"/> Administered (Finding Report: )<br>Gastrointestinal Endoscopy: <input type="checkbox"/> Not Administered, <input type="checkbox"/> Administered (Finding Report: )                                                                                                                                                                                                                                                                                                                                                                      |
| <b>Treatment/Prognosis</b>                                                         |                                                                                                                                                                                                                                                                                                                                                                                                                                                                                                                                                                                                                                            |
| Treatment                                                                          | <input type="checkbox"/> Observation the Progress (Include of Smoking Cessation)                                                                                                                                                                                                                                                                                                                                                                                                                                                                                                                                                           |
| 1. Symptomatic Treatment                                                           | <input type="checkbox"/> Analgesic Agent<br><input type="checkbox"/> Antihistaminic Agent<br><input type="checkbox"/> Hormone Replacement Therapy : <input type="checkbox"/> ADH, <input type="checkbox"/> Cortisol, <input type="checkbox"/> Other( )<br><input type="checkbox"/> Other( )                                                                                                                                                                                                                                                                                                                                                |
| 2. Local Treatment                                                                 | <input type="checkbox"/> Surgical Resection(Location: ) (Date: mm/yyyy )<br><input type="checkbox"/> Radiotherapy(Location: ,Total Gy) (Date: mm/yyyy )<br><input type="checkbox"/> External Medicine (Steroid) (Location: )                                                                                                                                                                                                                                                                                                                                                                                                               |
| 3. Systemic Treatment                                                              | <input type="checkbox"/> Steroids Monotherapy (Dose per Day , Dosing Period )<br><input type="checkbox"/> Chemotherapy: Duration of Therapy ( mm/yyyy- mm/yyyy )<br><input type="checkbox"/> Special-C regimen (VBL/PSL+MTX+6-MP) : Total courses<br><input type="checkbox"/> Regimen contained with Ara-C (Name of the Drug: ) : Total courses<br><input type="checkbox"/> Regimen contained with 2-CdA (Name of the Drug: ) : Total courses<br><input type="checkbox"/> Other (Name of the Drug: ) : Total courses<br><input type="checkbox"/> Hematopoietic Stem Cell Plantation : Autologous • Allo(Donor type, Conditioning Regimen): |
| Response at the end of the therapy<br>(For only local therapy or systemic therapy) | <input type="checkbox"/> Non active disease (NAD)<br>Relapse: <input type="checkbox"/> No, <input type="checkbox"/> Yes Date of Relapse: mm/yyyy- mm/yyyy<br>Relapse sites:<br>Therapy for Relapse:<br><input type="checkbox"/> Partial Response (PR)<br><input type="checkbox"/> No Response (NR)<br><input type="checkbox"/> Progression Disease (PD)                                                                                                                                                                                                                                                                                    |
| Prognosis at the time of evaluation                                                | <input type="checkbox"/> Alive, <input type="checkbox"/> Dead (Date of Death: mm/yyyy, Cause of Death: <input type="checkbox"/> LCH, <input type="checkbox"/> Other( )                                                                                                                                                                                                                                                                                                                                                                                                                                                                     |

|                                                                          |                                                                                                                                                                                                                                                                                                                                                                                                                                                                                                                                                                                  |
|--------------------------------------------------------------------------|----------------------------------------------------------------------------------------------------------------------------------------------------------------------------------------------------------------------------------------------------------------------------------------------------------------------------------------------------------------------------------------------------------------------------------------------------------------------------------------------------------------------------------------------------------------------------------|
| Other                                                                    |                                                                                                                                                                                                                                                                                                                                                                                                                                                                                                                                                                                  |
| <b>Questionnaire for the Adult LCH patient (Department of Pathology)</b> |                                                                                                                                                                                                                                                                                                                                                                                                                                                                                                                                                                                  |
| Date                                                                     | dd/mm/yyyy                                                                                                                                                                                                                                                                                                                                                                                                                                                                                                                                                                       |
| Name of Institution                                                      |                                                                                                                                                                                                                                                                                                                                                                                                                                                                                                                                                                                  |
| Person in charge                                                         | Dr.                                                                                                                                                                                                                                                                                                                                                                                                                                                                                                                                                                              |
| Contact details                                                          | e-mail :                                      Tel :                                      Fax :                                                                                                                                                                                                                                                                                                                                                                                                                                                                                   |
| <b>Characteristics of the Patient</b>                                    |                                                                                                                                                                                                                                                                                                                                                                                                                                                                                                                                                                                  |
| Patient Registration No                                                  |                                                                                                                                                                                                                                                                                                                                                                                                                                                                                                                                                                                  |
| Date of Birth                                                            | dd/mm/yyyy                                                                                                                                                                                                                                                                                                                                                                                                                                                                                                                                                                       |
| Sex                                                                      | 1. Male              2. Female                                                                                                                                                                                                                                                                                                                                                                                                                                                                                                                                                   |
| <b>Onset / Diagnosis</b>                                                 |                                                                                                                                                                                                                                                                                                                                                                                                                                                                                                                                                                                  |
| Date of Initial Symptom                                                  | mm/yyyy                                                                                                                                                                                                                                                                                                                                                                                                                                                                                                                                                                          |
| Initial Manifestation                                                    | <input type="checkbox"/> Fever <input type="checkbox"/> Headache <input type="checkbox"/> Bone Pain <input type="checkbox"/> Rash <input type="checkbox"/> Palpable mass <input type="checkbox"/> Palpable Lymph Node<br><input type="checkbox"/> Polyuria / Polydipsia <input type="checkbox"/> Respiratory Symptoms (eg, Cough, Breathlessness) <input type="checkbox"/> Visual Impairment<br><input type="checkbox"/> Memory Impairment <input type="checkbox"/> Other(    )                                                                                                  |
| Reason for consultation<br>(Except for Initial Symptom)                  |                                                                                                                                                                                                                                                                                                                                                                                                                                                                                                                                                                                  |
| Date of First Admission                                                  | mm/yyyy                                                                                                                                                                                                                                                                                                                                                                                                                                                                                                                                                                          |
| Department on First Admission                                            | <input type="checkbox"/> Internal Medicine(Hematology · Endocrinology · Respiratory Medicine · Gastroenterology · Neurology ·<br>Other:    ) <input type="checkbox"/> Dermatology <input type="checkbox"/> Ophthalmology <input type="checkbox"/> Otorhinolaryngology <input type="checkbox"/> Oral Surgery <input type="checkbox"/> Gynecology<br><input type="checkbox"/> General Surgery <input type="checkbox"/> Neurosurgery <input type="checkbox"/> Orthopedics <input type="checkbox"/> Other(    )                                                                      |
| Organ Involvement<br>(Based on imaging system)                           | <input type="checkbox"/> Skin <input type="checkbox"/> Mucous membrane <input type="checkbox"/> Bone (Sites:    ) <input type="checkbox"/> Thymus <input type="checkbox"/> Lung <input type="checkbox"/> Thyroid Gland<br><input type="checkbox"/> Bone marrow <input type="checkbox"/> Lymph Node(Sites:    ) <input type="checkbox"/> Liver <input type="checkbox"/> Spleen <input type="checkbox"/> Soft tissue<br><input type="checkbox"/> Central Nervous System (Except for Pituitary Gland) <input type="checkbox"/> Pituitary Gland <input type="checkbox"/> Other(    ) |
| Place of Biopsy                                                          |                                                                                                                                                                                                                                                                                                                                                                                                                                                                                                                                                                                  |
| Date of Determined Diagnosis                                             | mm/yyyy                                                                                                                                                                                                                                                                                                                                                                                                                                                                                                                                                                          |
| Histopathological Positivity                                             | <input type="checkbox"/> Only Hematoxylin-Eosin Stain <input type="checkbox"/> CD1a <input type="checkbox"/> S100 <input type="checkbox"/> Langerin <input type="checkbox"/> Birbeck granules                                                                                                                                                                                                                                                                                                                                                                                    |
| Genetic Mutations                                                        | <input type="checkbox"/> BRAF-V600E Mutation: positive, Negative, Unknown ( <input type="checkbox"/> Immunohistochemistry <input type="checkbox"/> Sequence <input type="checkbox"/> Cell<br>Free DNA) <input type="checkbox"/> Other( MAP2K1mutation    )                                                                                                                                                                                                                                                                                                                       |
